# Supplementary material
Source: Springer Nature journal article supplement (https://www.springermedizin.de/resource/supplementary/13223_2013_491_MOESM11_ESM.pdf/9596628)
Supplement: MOESM11 [file 9596628]

| Donnors                      | Variation after 3 days of culture |                   |                     | Variation after 6 days of culture |                   |                      |
|------------------------------|-----------------------------------|-------------------|---------------------|-----------------------------------|-------------------|----------------------|
|                              | Without dexametasone              | With dexametasone |                     | Without dexametasone              | With dexametasone |                      |
| Relatively Healthy donors    | <p>9%</p>                         | <p>15%</p>        | <p>↑ de<br/>66%</p> | <p>18%</p>                        | <p>43%</p>        | <p>↑ de<br/>190%</p> |
| Asthmatics of mild severity  | <p>8%</p>                         | <p>8%</p>         |                     | <p>15%</p>                        | <p>10%</p>        | <p>Decrease</p>      |
| Asthmatic of severe severity | <p>14%</p>                        | <p>14%</p>        |                     | <p>21%</p>                        | <p>16%</p>        | <p>Decrease</p>      |
